# Supplementary material for: Vector mapping and bloodmeal metabarcoding demonstrate risk of urban Chagas disease transmission in Caracas, Venezuela
Source: PLoS Negl Trop Dis. 2023 Mar 17;17(3):e0010613. doi: 10.1371/journal.pntd.0010613 (PMC10057784; doi:10.1371/journal.pntd.0010613)
Supplement: S1 Table — Specimens represent a random visually blooded subset from Petare, Baruta, and Sucre parishes. Nymphal stages were not analyzed. (XLSX) [file pntd.0010613.s003.xlsx]

## Sheet: Table support S1
S1 Table. Metadata on 108 P. geniculatus specimens used to identify blood feeding sources for the MDC collection period 2009 – 2016.
Index	Period	Code	Pool ID	State	Year	Municipality	Parish	Sex	Microscopy result (T. cruzi)	Bite report	Latitude (°)	Longitude (°)
1	2009-2012	VE23509A	1	Miranda	2009	Baruta	Nuestra Señora del Rosario de Baruta	Female	Negative	Not recorded	10.4352	-66.8905
2	2009-2012	VE22009D	5	D.C.	2009	Libertador	Sucre	Female	Negative	Not recorded	10.5264	-66.9338
3	2009-2012	VE14509	5	D.C.	2009	Libertador	Sucre	Female	Negative	Not recorded	10.5199	-66.9356
4	2009-2012	VE35209	5	D.C.	2009	Libertador	Sucre	Female	Negative	Not recorded	10.5223	-66.9274
5	2009-2012	VE14009	7	D.C.	2009	Libertador	Sucre	Male	Negative	Not recorded	10.5181	-66.9739
6	2009-2012	VE20309	9	Miranda	2009	Sucre	Petare	Female	Negative	Not recorded	10.4844	-66.8156
7	2009-2012	VE11309	9	Miranda	2009	Sucre	Petare	Female	Negative	Not recorded	10.4576	-66.7967
8	2009-2012	VE62209	11	Miranda	2009	Sucre	Petare	Male	Negative	Not recorded	10.4655	-66.8015
9	2009-2012	VE101010	3	Miranda	2010	Baruta	Nuestra Señora del Rosario de Baruta	Male	Negative	Not recorded	10.4483	-66.8681
10	2009-2012	VE56410	11	Miranda	2010	Sucre	Petare	Male	Negative	Not recorded	10.46	-66.792
11	2009-2012	VE3211	2	Miranda	2011	Baruta	Nuestra Señora del Rosario de Baruta	Female	Positive	Not recorded	10.3723	-66.8758
12	2009-2012	VE8311B	2	Miranda	2011	Baruta	Nuestra Señora del Rosario de Baruta	Female	Positive	Not recorded	10.4477	-66.8651
13	2009-2012	VE38511	2	Miranda	2011	Baruta	Nuestra Señora del Rosario de Baruta	Female	Positive	Not recorded	10.4298	-66.8752
14	2009-2012	VE30911	2	Miranda	2011	Baruta	Nuestra Señora del Rosario de Baruta	Female	Positive	Not recorded	10.4654	-66.8833
15	2009-2012	VE33111	2	Miranda	2011	Baruta	Nuestra Señora del Rosario de Baruta	Female	Positive	Not recorded	10.4291	-66.8902
16	2009-2012	VE4011	4	Miranda	2011	Baruta	Nuestra Señora del Rosario de Baruta	Male	Positive	Not recorded	10.4804	-66.8791
17	2009-2012	VE35611	6	D.C.	2011	Libertador	Sucre	Female	Positive	Not recorded	10.5152	-66.945
18	2009-2012	VE8511	6	D.C.	2011	Libertador	Sucre	Female	Positive	Not recorded	10.5261	-66.983
19	2009-2012	VE42911	8	D.C.	2011	Libertador	Sucre	Male	Positive	Not recorded	10.5163	-66.9412
20	2009-2012	VE34211	10	Miranda	2011	Sucre	Petare	Female	Positive	Not recorded	10.466	-66.7963
21	2009-2012	VE21811	10	Miranda	2011	Sucre	Petare	Female	Positive	Not recorded	10.4626	-66.7911
22	2009-2012	VE54111	10	Miranda	2011	Sucre	Petare	Female	Positive	Not recorded	10.4625	-66.796
23	2009-2012	VE40211	10	Miranda	2011	Sucre	Petare	Female	Positive	Not recorded	10.4691	-66.8098
24	2009-2012	VE30711	10	Miranda	2011	Sucre	Petare	Female	Positive	Not recorded	10.4823	-66.7762
25	2009-2012	VE6811	11	Miranda	2011	Sucre	Petare	Male	Negative	Not recorded	10.4647	-66.7974
26	2009-2012	VE227A11	12	Miranda	2011	Sucre	Petare	Male	Positive	Not recorded	10.4607	-66.788
27	2009-2012	VE51511	12	Miranda	2011	Sucre	Petare	Male	Positive	Not recorded	10.4728	-66.8086
28	2009-2012	VE44911	12	Miranda	2011	Sucre	Petare	Male	Positive	Not recorded	10.4819	-66.7702
29	2009-2012	VE24012	1	Miranda	2012	Baruta	Nuestra Señora del Rosario de Baruta	Female	Negative	Not recorded	10.4222	-66.8875
30	2009-2012	VE33212	1	Miranda	2012	Baruta	Nuestra Señora del Rosario de Baruta	Female	Negative	Not recorded	10.4306	-66.8854
31	2009-2012	VE8212	2	Miranda	2012	Baruta	Nuestra Señora del Rosario de Baruta	Female	Positive	Not recorded	10.4524	-66.8873
32	2009-2012	VE20812	2	Miranda	2012	Baruta	Nuestra Señora del Rosario de Baruta	Female	Positive	Not recorded	10.4474	-66.8841
33	2009-2012	VE11012	5	D.C.	2012	Libertador	Sucre	Female	Negative	Not recorded	10.504	-66.9656
34	2009-2012	VE23112	6	D.C.	2012	Libertador	Sucre	Female	Positive	Not recorded	10.5185	-66.9371
35	2009-2012	VE27912	6	D.C.	2012	Libertador	Sucre	Female	Positive	Not recorded	10.5212	-66.9499
36	2009-2012	VE4512	8	D.C.	2012	Libertador	Sucre	Male	Positive	Not recorded	10.5194	-66.9356
37	2009-2012	VE37012	8	D.C.	2012	Libertador	Sucre	Male	Positive	Not recorded	10.5061	-66.9628
38	2009-2012	VE7612	8	D.C.	2012	Libertador	Sucre	Male	Positive	Not recorded	10.5163	-66.9574
39	2009-2012	VE22012	9	Miranda	2012	Sucre	Petare	Female	Negative	Not recorded	10.4636	-66.7959
40	2009-2012	VE35012	10	Miranda	2012	Sucre	Petare	Female	Positive	Not recorded	10.4837	-66.8147
41	2009-2012	VE20512	10	Miranda	2012	Sucre	Petare	Female	Positive	Not recorded	10.467	-66.8191
42	2009-2012	VE22612	11	Miranda	2012	Sucre	Petare	Male	Negative	Not recorded	10.5154	-66.9384
43	2009-2012	VE11712	11	Miranda	2012	Sucre	Petare	Male	Negative	Not recorded	10.4792	-66.7914
44	2009-2012	VE34812	12	Miranda	2012	Sucre	Petare	Male	Positive	Not recorded	10.5011	-66.7936
45	2013-2016	VE28913	13	Miranda	2013	Baruta	Nuestra Señora del Rosario de Baruta	Female	Negative	Not recorded	10.4523	-66.8878
46	2013-2016	VE24013	13	Miranda	2013	Baruta	Nuestra Señora del Rosario de Baruta	Female	Negative	Not recorded	10.4518	-66.8893
47	2013-2016	VE10213	13	Miranda	2013	Baruta	Nuestra Señora del Rosario de Baruta	Female	Negative	Not recorded	10.4816	-66.8789
48	2013-2016	VE23913	14	Miranda	2013	Baruta	Nuestra Señora del Rosario de Baruta	Female	Positive	Not recorded	10.4739	-66.8527
49	2013-2016	VE5813	16	Miranda	2013	Baruta	Nuestra Señora del Rosario de Baruta	Male	Positive	Not recorded	10.5187	-66.956
50	2013-2016	VE24813	16	Miranda	2013	Baruta	Nuestra Señora del Rosario de Baruta	Male	Positive	Not recorded	10.4807	-66.8798
51	2013-2016	VE7713	16	Miranda	2013	Baruta	Nuestra Señora del Rosario de Baruta	Male	Positive	Not recorded	10.4002	-66.8481
52	2013-2016	VE38513	21	Miranda	2013	Sucre	Petare	Female	Negative	Not recorded	10.4601	-66.7889
53	2013-2016	VE13913A	22	Miranda	2013	Sucre	Petare	Female	Positive	Not recorded	10.4836	-66.7986
54	2013-2016	VE3213	22	Miranda	2013	Sucre	Petare	Female	Positive	Not recorded	10.4603	-66.7877
55	2013-2016	VE38613	22	Miranda	2013	Sucre	Petare	Female	Positive	Not recorded	10.4601	-66.7879
56	2013-2016	VE20113	22	Miranda	2013	Sucre	Petare	Female	Positive	Not recorded	10.4952	-66.7925
57	2013-2016	VE10713	24	Miranda	2013	Sucre	Petare	Male	Positive	Not recorded	10.4713	-66.8082
58	2013-2016	VE13913B	24	Miranda	2013	Sucre	Petare	Male	Positive	Not recorded	10.4836	-66.7986
59	2013-2016	VE6614	13	Miranda	2014	Baruta	Nuestra Señora del Rosario de Baruta	Female	Negative	Bite suspected by participant	10.4337	-66.8588
60	2013-2016	VE6714	13	Miranda	2014	Baruta	Nuestra Señora del Rosario de Baruta	Female	Negative	Bite suspected by participant	10.3876	-66.8552
61	2013-2016	VE9514	14	Miranda	2014	Baruta	Nuestra Señora del Rosario de Baruta	Female	Positive	Bite suspected by participant	10.3924	-66.8913
62	2013-2016	VE26014	15	Miranda	2014	Baruta	Nuestra Señora del Rosario de Baruta	Male	Negative	Bite suspected by participant	10.4244	-66.8735
63	2013-2016	VE26514	21	Miranda	2014	Sucre	Petare	Female	Negative	Bite suspected by participant	10.4748	-66.7999
64	2013-2016	VE17114	22	Miranda	2014	Sucre	Petare	Female	Positive	Bite suspected by participant	10.4601	-66.7886
65	2013-2016	VE4614	22	Miranda	2014	Sucre	Petare	Female	Positive	Bite suspected by participant	10.4385	-66.8627
66	2013-2016	VE1214D	22	Miranda	2014	Sucre	Petare	Female	Positive	Bite suspected by participant	10.4801	-66.8025
67	2013-2016	VE9114	24	Miranda	2014	Sucre	Petare	Male	Positive	Bite suspected by participant	10.4775	-66.809
68	2013-2016	VE32014	24	Miranda	2014	Sucre	Petare	Male	Positive	Bite suspected by participant	10.4754	-66.8009
69	2013-2016	VE7414C	17	D.C.	2014	Libertador	Sucre	Female	Negative	Bite suspected by participant	10.5066	-66.9711
70	2013-2016	VE23614	18	D.C.	2014	Libertador	Sucre	Female	Positive	Bite suspected by participant	10.51	-66.9585
71	2013-2016	VE35814	18	D.C.	2014	Libertador	Sucre	Female	Positive	Bite suspected by participant	10.493	-66.9834
72	2013-2016	VE34914	18	D.C.	2014	Libertador	Sucre	Female	Positive	Bite suspected by participant	10.5229	-66.9423
73	2013-2016	VE4714	20	D.C.	2014	Libertador	Sucre	Male	Positive	Patient did not know	10.5212	-66.9536
74	2013-2016	VE22415A	14	Miranda	2015	Baruta	Nuestra Señora del Rosario de Baruta	Female	Positive	Bite suspected by participant	10.4345	-66.8747
75	2013-2016	VE15215	16	Miranda	2015	Baruta	Nuestra Señora del Rosario de Baruta	Male	Positive	No bite suspected by participant	10.4327	-66.895
76	2013-2016	VE26115	16	Miranda	2015	Baruta	Nuestra Señora del Rosario de Baruta	Male	Positive	Bite suspected by participant	10.4311	-66.8591
77	2013-2016	VE14415	22	Miranda	2015	Sucre	Petare	Female	Positive	No bite suspected by participant	10.475	-66.798
78	2013-2016	VE13215	22	Miranda	2015	Sucre	Petare	Female	Positive	Bite suspected by participant	10.4924	-66.7694
79	2013-2016	VE14915	18	D.C.	2015	Libertador	Sucre	Female	Positive	Bite suspected by participant	10.5189	-66.9772
80	2013-2016	VE25015	20	D.C.	2015	Libertador	Sucre	Male	Positive	Bite suspected by participant	10.5201	-66.9488
81	2013-2016	VE10216B	14	Miranda	2016	Baruta	Nuestra Señora del Rosario de Baruta	Female	Positive	Bite suspected by participant	10.3749	-66.8831
82	2013-2016	VE9216	14	Miranda	2016	Baruta	Nuestra Señora del Rosario de Baruta	Female	Positive	Bite suspected by participant	10.3757	-66.8832
83	2013-2016	VE8816	14	Miranda	2016	Baruta	Nuestra Señora del Rosario de Baruta	Female	Positive	Bite suspected by participant	10.3767	-66.8825
84	2013-2016	VE18316	21	Miranda	2016	Sucre	Petare	Female	Negative	No bite suspected by participant	10.4647	-66.8018
85	2013-2016	VE6616	21	Miranda	2016	Sucre	Petare	Female	Negative	Bite suspected by participant	10.4747	-66.8025
86	2013-2016	VE16816	21	Miranda	2016	Sucre	Petare	Female	Negative	Bite suspected by participant	10.453	-66.7975
87	2013-2016	VE21216	21	Miranda	2016	Sucre	Petare	Female	Negative	No bite suspected by participant	10.4819	-66.769
88	2013-2016	VE3216	21	Miranda	2016	Sucre	Petare	Female	Negative	Bite suspected by participant	10.4834	-66.8017
89	2013-2016	VE10616	22	Miranda	2016	Sucre	Petare	Female	Positive	Bite suspected by participant	10.493	-66.7972
90	2013-2016	VE16616	22	Miranda	2016	Sucre	Petare	Female	Positive	Bite suspected by participant	10.4694	-66.8089
91	2013-2016	VE7916	22	Miranda	2016	Sucre	Petare	Female	Positive	Bite suspected by participant	10.4563	-66.7825
92	2013-2016	VE20116	23	Miranda	2016	Sucre	Petare	Male	Negative	Bite suspected by participant	10.4945	-66.7921
93	2013-2016	VE11716	24	Miranda	2016	Sucre	Petare	Male	Positive	Bite suspected by participant	10.4572	-66.7866
94	2013-2016	VE3716	24	Miranda	2016	Sucre	Petare	Male	Positive	Bite suspected by participant	10.4577	-66.7879
95	2013-2016	VE5516B	24	Miranda	2016	Sucre	Petare	Male	Positive	Bite suspected by participant	10.4816	-66.7683
96	2013-2016	VE7516	24	Miranda	2016	Sucre	Petare	Male	Positive	Bite suspected by participant	10.4799	-66.8032
97	2013-2016	VE10516B	17	D.C.	2016	Libertador	Sucre	Female	Negative	Bite suspected by participant	10.5204	-66.9521
98	2013-2016	VE5016B	18	D.C.	2016	Libertador	Sucre	Female	Positive	Bite suspected by participant	10.4946	-66.9827
99	2013-2016	VE0116	18	D.C.	2016	Libertador	Sucre	Female	Positive	Bite suspected by participant	10.5209	-66.9339
100	2013-2016	VE13516	18	D.C.	2016	Libertador	Sucre	Female	Positive	Bite suspected by participant	10.5195	-66.9338
101	2013-2016	VE0816A	18	D.C.	2016	Libertador	Sucre	Female	Positive	Bite suspected by participant	10.5201	-66.9525
102	2013-2016	VE19416	19	D.C.	2016	Libertador	Sucre	Male	Negative	Bite suspected by participant	10.5346	-66.9737
103	2013-2016	VE5016A	19	D.C.	2016	Libertador	Sucre	Male	Negative	Bite suspected by participant	10.4946	-66.9827
104	2013-2016	VE7416	20	D.C.	2016	Libertador	Sucre	Male	Positive	Bite suspected by participant	10.5202	-66.9772
105	2013-2016	VE2116	20	D.C.	2016	Libertador	Sucre	Male	Positive	Bite suspected by participant	10.4981	-66.9514
106	2013-2016	VE6116	20	D.C.	2016	Libertador	Sucre	Male	Positive	Bite suspected by participant	10.5184	-66.9512
107	2013-2016	VE10516C	20	D.C.	2016	Libertador	Sucre	Male	Positive	Bite suspected by participant	10.5204	-66.9521
108	2013-2016	VE15316	20	D.C.	2016	Libertador	Sucre	Male	Positive	Bite suspected by participant	10.5191	-66.9387
