# Supplementary material for: Vector mapping and bloodmeal metabarcoding demonstrate risk of urban Chagas disease transmission in Caracas, Venezuela
Source: PLoS Negl Trop Dis. 2023 Mar 17;17(3):e0010613. doi: 10.1371/journal.pntd.0010613 (PMC10057784; doi:10.1371/journal.pntd.0010613)
Supplement: S2 Table — Abbreviations ‘NEG’ and ‘POS’ denote negative vs. positive T. cruzi infection status inferred via microscopy. (XLSX) [file pntd.0010613.s004.xlsx]

## Sheet: Table support S2
S2 Table. Rates of natural T. cruzi infection in triatomine specimens for the MDC collection period 2007 – 2019, tabulated by species.
		2007		2008		2009		2010		2011		2012		2013		2014		2015		2016		2017		2018		2019		2007 – 2019
Species	Stage	NEG	POS	NEG	POS	NEG	POS	NEG	POS	NEG	POS	NEG	POS	NEG	POS	NEG	POS	NEG	POS	NEG	POS	NEG	POS	NEG	POS	NEG	POS	NEG	POS	NEG%	POS%
Panstrongylus geniculatus	Total	34	40	151	241	153	304	205	762	40	311	56	212	42	222	52	206	44	147	36	121	31	81	40	81	53	145	937	2873	0.245932	0.754068
	Female adult	20	22	84	134	73	173	77	379	24	187	26	130	29	135	29	131	24	94	25	76	14	49	24	63	30	73	479	1646	0.225412	0.774588
	Male adult	14	11	61	103	71	115	122	368	13	122	23	75	10	80	21	72	16	49	10	40	14	28	11	18	17	68	403	1149	0.259665	0.740335
	Nymph II	0	0	0	0	0	0	0	0	0	0	0	0	0	0	0	0	3	0	0	0	0	0	0	0	0	0	3	0	1	0
	Nymph III	0	1	1	1	0	6	2	4	1	0	2	1	0	0	1	2	1	1	0	1	0	0	1	0	2	2	11	19	0.366667	0.633333
	Nymph IV	0	5	5	2	6	7	2	8	1	0	4	4	3	7	1	1	0	2	1	3	0	1	1	0	2	1	26	41	0.38806	0.61194
	Nymph V	0	1	0	1	3	3	2	3	1	2	1	2	0	0	0	0	0	1	0	1	3	3	3	0	2	1	15	18	0.454545	0.545455
Panstrongylus rufotuberculatus	Total	0	0	0	0	0	0	0	0	0	0	0	0	0	0	0	0	0	0	0	1	0	0	0	0	0	1	0	2	0	1
	Female adult	0	0	0	0	0	0	0	0	0	0	0	0	0	0	0	0	0	0	0	0	0	0	0	0	0	1	0	1	0	1
	Male adult	0	0	0	0	0	0	0	0	0	0	0	0	0	0	0	0	0	0	0	1	0	0	0	0	0	0	0	1	0	1
Rhodnius prolixus	Total	0	0	0	0	1	1	0	0	0	0	0	0	0	0	0	0	0	0	0	0	0	0	0	0	0	0	1	1	0.5	0.5
	Male adult	0	0	0	0	1	1	0	0	0	0	0	0	0	0	0	0	0	0	0	0	0	0	0	0	0	0	1	1	0.5	0.5
Triatoma maculata	Total	0	0	1	0	1	0	1	2	1	2	0	2	1	0	0	0	0	0	0	0	0	0	0	0	1	0	6	6	0.5	0.5
	Female adult	0	0	0	0	1	0	1	2	0	1	0	1	1	0	0	0	0	0	0	0	0	0	0	0	0	0	3	4	0.428571	0.571429
	Male adult	0	0	1	0	0	0	0	0	1	1	0	1	0	0	0	0	0	0	0	0	0	0	0	0	0	0	2	2	0.5	0.5
	Nymph IV	0	0	0	0	0	0	0	0	0	0	0	0	0	0	0	0	0	0	0	0	0	0	0	0	1	0	1	0	1	0
Triatoma nigromaculata	Total	0	0	0	1	1	2	4	5	1	0	1	0	0	0	0	1	3	0	0	0	0	0	0	0	0	0	10	9	0.526316	0.473684
	Female adult	0	0	0	1	1	2	2	2	0	0	1	0	0	0	0	1	3	0	0	0	0	0	0	0	0	0	7	6	0.538462	0.461538
	Male adult	0	0	0	0	0	0	2	3	1	0	0	0	0	0	0	0	0	0	0	0	0	0	0	0	0	0	3	3	0.5	0.5
	Total	34	40	152	242	156	307	210	769	42	313	57	214	43	222	52	207	47	147	36	122	31	81	40	81	54	146	954	2891	0.248114	0.751886
