# Supplementary material for: Vector mapping and bloodmeal metabarcoding demonstrate risk of urban Chagas disease transmission in Caracas, Venezuela
Source: PLoS Negl Trop Dis. 2023 Mar 17;17(3):e0010613. doi: 10.1371/journal.pntd.0010613 (PMC10057784; doi:10.1371/journal.pntd.0010613)
Supplement: S3 Table — Infection status was inferred via microscopy. (XLSX) [file pntd.0010613.s005.xlsx]

## Sheet: Table support S3
	S3 Table. Rates of natural T. cruzi infection in triatomine specimens for the MDC collection period 2007 – 2019, tabulated by parish.
ID	Parish	Negative	%	Positive	%	Total
1	23 de Enero	3	0.230769	10	0.769231	13
2	Altagracia	6	0.1875	26	0.8125	32
3	Antímano	18	0.272727	48	0.727273	66
4	Candelaria	1	0.25	3	0.75	4
5	Caricuao	20	0.285714	50	0.714286	70
6	Catedral	0	0	0	0	0
7	Coche	5	0.333333	10	0.666667	15
8	El Junquito	59	0.247899	179	0.752101	238
9	El Paraíso	4	0.129032	27	0.870968	31
10	El Recreo	6	0.162162	31	0.837838	37
11	El Valle	8	0.5	8	0.5	16
12	La Pastora	62	0.233083	204	0.766917	266
13	La Vega	22	0.22	78	0.78	100
14	Macarao	4	0.190476	17	0.809524	21
15	San Agustín	3	0.230769	10	0.769231	13
16	San Bernardino	4	0.173913	19	0.826087	23
17	San José	9	0.257143	26	0.742857	35
18	San Juan	2	0.666667	1	0.333333	3
19	San Pedro	15	0.375	25	0.625	40
20	Santa Rosalía	1	0.166667	5	0.833333	6
21	Santa Teresa	3	0.428571	4	0.571429	7
22	Sucre	108	0.225941	370	0.774059	478
23	Nuestra Señora del Rosario de Baruta	121	0.287411	300	0.712589	421
24	El Cafetal	29	0.195946	119	0.804054	148
25	Las Minas de Baruta	24	0.296296	57	0.703704	81
26	Chacao	11	0.333333	22	0.666667	33
27	Santa Rosalía de Palermo	93	0.356322	168	0.643678	261
28	Filas de Mariches	51	0.251232	152	0.748768	203
29	La Dolorita	19	0.253333	56	0.746667	75
30	Leoncio Martínez	37	0.23125	123	0.76875	160
31	Caucagüita	22	0.252874	65	0.747126	87
32	Petare	184	0.213457	678	0.786543	862
	Total	954	0.248114	2891	0.751886	3845
