# Supplementary material for: Vector mapping and bloodmeal metabarcoding demonstrate risk of urban Chagas disease transmission in Caracas, Venezuela
Source: PLoS Negl Trop Dis. 2023 Mar 17;17(3):e0010613. doi: 10.1371/journal.pntd.0010613 (PMC10057784; doi:10.1371/journal.pntd.0010613)
Supplement: S4 Table — Abbreviations ‘B’ and ‘NB’ denote presence and absence of blood-like intestinal content, respectively. (XLSX) [file pntd.0010613.s006.xlsx]

## Sheet: Table support S4
S4 Table. Rates of observing liquid material (potential bloodmeal) in triatomine intestinal content for the MDC collection period 2007 – 2019, tabulated by species.
		2007		2008		2009		2010		2011		2012		2013		2014		2015		2016		2017		2018		2019		2007 – 2019
Species		NB	B	NB	B	NB	B	NB	B	NB	B	NB	B	NB	B	NB	B	NB	B	NB	B	NB	B	NB	B	NB	B	NB	B	NB%	B%
Panstrongylus geniculatus	Total	37	41	223	169	285	273	642	511	180	202	138	162	126	196	84	198	68	145	57	133	48	86	42	102	105	127	2035	2345	0.464612	0.535388
	Female	18	26	100	118	125	176	246	320	83	150	62	116	57	144	29	149	39	93	31	97	16	67	22	81	37	87	865	1624	0.347529	0.652471
	Male	19	8	116	48	151	72	392	173	97	47	74	33	67	42	55	42	29	44	24	31	32	12	19	17	66	30	1141	599	0.655747	0.344253
	Nymph II	0	0	0	0	0	0	0	0	0	0	0	0	0	0	0	0	0	3	0	0	0	0	0	0	0	0	0	3	0	1
	Nymph III	0	1	2	0	3	5	1	6	0	1	0	3	0	1	0	4	0	2	0	1	0	0	0	1	1	4	7	29	0.194444	0.805556
	Nymph IV	0	5	5	2	3	15	3	7	0	1	2	7	2	9	0	3	0	2	2	3	0	1	1	0	0	4	18	59	0.233766	0.766234
	Nymph V	0	1	0	1	3	5	0	5	0	3	0	3	0	0	0	0	0	1	0	1	0	6	0	3	1	2	4	31	0.114286	0.885714
Panstrongylus rufotuberculatus	Total	0	0	0	0	0	0	0	0	0	0	0	0	0	0	0	0	0	0	0	1	0	0	0	0	1	0	1	1	0.5	0.5
	Female	0	0	0	0	0	0	0	0	0	0	0	0	0	0	0	0	0	0	0	0	0	0	0	0	1	0	1	0	1	0
	Male	0	0	0	0	0	0	0	0	0	0	0	0	0	0	0	0	0	0	0	1	0	0	0	0	0	0	0	1	0	1
Rhodnius prolixus	Total	0	0	0	0	1	1	0	0	0	0	0	0	0	0	0	0	0	1	0	0	0	0	0	0	0	0	1	2	0.333333	0.666667
	Female	0	0	0	0	0	0	0	0	0	0	0	0	0	0	0	0	0	1	0	0	0	0	0	0	0	0	0	1	0	1
	Male	0	0	0	0	1	1	0	0	0	0	0	0	0	0	0	0	0	0	0	0	0	0	0	0	0	0	1	1	0.5	0.5
Triatoma maculata	Total	0	0	1	0	0	1	4	0	2	1	2	0	2	0	0	0	1	0	0	0	0	0	0	0	0	1	12	3	0.8	0.2
	Female	0	0	0	0	0	1	3	0	1	0	1	0	1	0	0	0	0	0	0	0	0	0	0	0	0	0	6	1	0.857143	0.142857
	Male	0	0	1	0	0	0	1	0	1	1	1	0	1	0	0	0	1	0	0	0	0	0	0	0	0	0	6	1	0.857143	0.142857
	Nymph IV	0	0	0	0	0	0	0	0	0	0	0	0	0	0	0	0	0	0	0	0	0	0	0	0	0	1	0	1	0	1
Triatoma nigromaculata	Total	0	0	1	0	2	1	4	8	0	1	1	0	0	0	1	0	1	2	0	0	0	0	0	0	0	0	10	12	0.454545	0.545455
	Female	0	0	1	0	2	1	2	4	0	0	1	0	0	0	1	0	1	2	0	0	0	0	0	0	0	0	8	7	0.533333	0.466667
	Male	0	0	0	0	0	0	2	4	0	1	0	0	0	0	0	0	0	0	0	0	0	0	0	0	0	0	2	5	0.285714	0.714286
	Total	37	41	225	169	288	276	650	519	182	204	141	162	128	196	85	198	70	148	57	134	48	86	42	102	106	128	2059	2363	0.465626	0.534374
