# Supplementary material for: Vector mapping and bloodmeal metabarcoding demonstrate risk of urban Chagas disease transmission in Caracas, Venezuela
Source: PLoS Negl Trop Dis. 2023 Mar 17;17(3):e0010613. doi: 10.1371/journal.pntd.0010613 (PMC10057784; doi:10.1371/journal.pntd.0010613)
Supplement: S5 Table — The presence of blood-like intestinal content is also referred to as the ‘visually blooded’ condition elsewhere in this work. (XLSX) [file pntd.0010613.s007.xlsx]

## Sheet: Table support S5
	S5 Table. Rates of observing liquid material (potential bloodmeal) in triatomine intestinal content for the MDC collection period 2007 – 2019, tabulated by parish.
ID	Parish	No blood-like content	%	Blood-like content	%	Total
1	23 de Enero	9	0.642857	5	0.357143	14
2	Altagracia	22	0.594595	15	0.405405	37
3	Antímano	29	0.371795	49	0.628205	78
4	Candelaria	3	0.6	2	0.4	5
5	Caricuao	44	0.55	36	0.45	80
6	Catedral	0	0	0	0	0
7	Coche	11	0.578947	8	0.421053	19
8	El Junquito	109	0.39781	165	0.60219	274
9	El Paraíso	15	0.454545	18	0.545455	33
10	El Recreo	34	0.790698	9	0.209302	43
11	El Valle	8	0.444444	10	0.555556	18
12	La Pastora	141	0.468439	160	0.531561	301
13	La Vega	41	0.353448	75	0.646552	116
14	Macarao	13	0.619048	8	0.380952	21
15	San Agustín	6	0.428571	8	0.571429	14
16	San Bernardino	19	0.791667	5	0.208333	24
17	San José	26	0.604651	17	0.395349	43
18	San Juan	2	0.5	2	0.5	4
19	San Pedro	28	0.571429	21	0.428571	49
20	Santa Rosalía	6	0.545455	5	0.454545	11
21	Santa Teresa	4	0.571429	3	0.428571	7
22	Sucre	207	0.373646	347	0.626354	554
23	Nuestra Señora del Rosario de Baruta	263	0.542268	222	0.457732	485
24	El Cafetal	104	0.630303	61	0.369697	165
25	Las Minas de Baruta	62	0.645833	34	0.354167	96
26	Chacao	22	0.611111	14	0.388889	36
27	Santa Rosalía de Palermo	150	0.487013	158	0.512987	308
28	Filas de Mariches	72	0.292683	174	0.707317	246
29	La Dolorita	43	0.494253	44	0.505747	87
30	Leoncio Martínez	114	0.636872	65	0.363128	179
31	Caucagüita	47	0.443396	59	0.556604	106
32	Petare	405	0.417957	564	0.582043	969
	Total	2059	0.465626	2363	0.534374	4422
