# Supplementary material for: Vector mapping and bloodmeal metabarcoding demonstrate risk of urban Chagas disease transmission in Caracas, Venezuela
Source: PLoS Negl Trop Dis. 2023 Mar 17;17(3):e0010613. doi: 10.1371/journal.pntd.0010613 (PMC10057784; doi:10.1371/journal.pntd.0010613)
Supplement: S6 Table — Values represent percentages of collected specimens representing nymphs. (XLSX) [file pntd.0010613.s008.xlsx]

## Sheet: Table support S6
	S6 Table. Prevalence of nymphal triatomine stages for the MDC collection period 2007 – 2019, tabulated by parish.
ID	Parish	2007	2008	2009	2010	2011	2012	2013	2014	2015	2016	2017	2018	2019	2007 – 2019
1	23 de Enero	0	0	0	0	0	0	0	0	0	0	50	0	0	6.25
2	Altagracia	0	16.6667	0	0	0	0	0	0	0	0	0	0	0	2.5641
3	Antímano	0	0	12	7.14286	0	0	0	0	0	0	0	0	0	7.07071
4	Candelaria	0	0	0	0	0	0	0	0	0	0	0	0	0	0
5	Caricuao	0	0	0	0	0	0	14.2857	0	0	0	0	0	14.2857	2.32558
6	Catedral	0	0	0	0	0	0	0	0	0	0	0	0	0	0
7	Coche	0	0	0	0	0	0	0	0	0	0	0	0	0	0
8	El Junquito	0	7.69231	5.55556	1.20482	0	0	0	0	3.44828	0	0	4.7619	0	1.6835
9	El Paraíso	0	0	0	0	0	0	0	0	0	0	0	0	0	0
10	El Recreo	0	0	0	0	0	0	0	0	0	0	0	0	0	0
11	El Valle	0	0	0	0	0	0	0	0	0	0	0	0	0	0
12	La Pastora	0	3.0303	3.33333	3.84615	0	0	0	4.7619	0	0	0	0	5.88235	2.50784
13	La Vega	0	0	0	0	0	18.1818	0	13.3333	0	0	0	0	0	3.30579
14	Macarao	0	0	0	0	0	0	0	0	0	0	0	0	0	0
15	San Agustín	0	0	0	0	0	0	0	0	0	0	0	0	0	0
16	San Bernardino	0	0	0	0	0	0	0	0	0	0	0	0	0	0
17	San José	0	0	0	0	0	0	0	0	0	0	0	0	0	0
18	San Juan	0	0	0	0	0	0	0	0	0	0	0	0	0	0
19	San Pedro	0	0	0	0	0	0	0	0	0	0	0	0	0	0
20	Santa Rosalía	0	0	0	0	0	0	0	0	0	0	0	0	0	0
21	Santa Teresa	0	0	0	0	0	0	0	0	0	0	0	0	0	0
22	Sucre	66.6667	5.88235	8.49057	6.47482	2.77778	9.09091	0	1.88679	0	12.1212	12.5	10.5263	0	6.46204
23	Nuestra Señora del Rosario de Baruta	20	0	2.73973	0	0	2.7027	0	0	0	0	0	9.09091	8.69565	1.66359
24	El Cafetal	0	0	3.44828	0	8	0	0	0	0	0	0	0	0	1.72414
25	Las Minas de Baruta	50	28.5714	9.09091	4	6.66667	0	7.69231	0	0	0	0	25	0	7.61905
26	Chacao	0	0	0	0	0	33.3333	33.3333	0	0	0	0	0	33.3333	7.69231
27	Santa Rosalía de Palermo	0	3.57143	2.5641	1.13636	4.54545	4.7619	0	0	5.26316	0	0	0	11.1111	2.73556
28	Filas de Mariches	0	10.5263	10.2564	2.5974	4.34783	6.25	17.6471	0	0	0	0	0	0	5.14706
29	La Dolorita	0	0	0	4	0	33.3333	0	9.09091	12.5	25	0	0	0	6.66667
30	Leoncio Martínez	0	0	0	0	0	0	0	0	33.3333	0	0	0	0	2.63158
31	Caucagüita	0	0	0	0	0	0	0	0	0	0	0	0	66.6667	1.83486
32	Petare	8.33333	2.6087	9.62963	1.74825	2.91262	4.87805	7.14286	3.8961	2.27273	1.63934	15.3846	0	5.55556	4.24354
	Total	8.97436	3.5	6.01852	1.96696	2.00445	5.07042	3.42857	2.44648	3.75	3.28638	4.82759	3.28947	5.7377	3.57143
